# Supplementary material for: Decline of Yangtze River water and sediment discharge: Impact from natural and anthropogenic changes
Source: Springer Nature journal article supplement (doi:10.1038/srep12581), 2015-07-24
Supplement: 41598_2015_BFsrep12581_MOESM1_ESM.pdf [file 41598_2015_BFsrep12581_MOESM1_ESM.pdf]

## Decline of Yangtze River water and sediment discharge: Impact from natural and anthropogenic changes

S.L. Yang, K.H. Xu, J.D. Milliman, H. F. Yang, C.S. Wu

Table S1 Post-TGD annual precipitation ( $P$ ), water discharge ( $Q$ ), sediment flux ( $Q_s$ ), and their changes (%) relative to the averages of the pre-TGD periods

|                                                                                                                                                                                      | Upstream basin at Yichang <sup>d</sup><br>(1006×10 <sup>3</sup> km <sup>2</sup> ) |                                      |                                   | Hanjiang River basin<br>(142×10 <sup>3</sup> km <sup>2</sup> ) |                                    |                                    | Lake Dongting basin<br>(209 ×10 <sup>3</sup> km <sup>2</sup> ) |                                      |                                   | Lake Poyang basin<br>(122 ×10 <sup>3</sup> km <sup>2</sup> ) |                                     |                                   | Basin upper than Datong (tidal limit) (1705 ×10 <sup>3</sup> km <sup>2</sup> ) |                                      |                                   |
|--------------------------------------------------------------------------------------------------------------------------------------------------------------------------------------|-----------------------------------------------------------------------------------|--------------------------------------|-----------------------------------|----------------------------------------------------------------|------------------------------------|------------------------------------|----------------------------------------------------------------|--------------------------------------|-----------------------------------|--------------------------------------------------------------|-------------------------------------|-----------------------------------|--------------------------------------------------------------------------------|--------------------------------------|-----------------------------------|
|                                                                                                                                                                                      | $P$<br>(mm/yr)                                                                    | $Q$<br>(km <sup>3</sup> /yr)         | $Q_s$<br>(Mt/yr)                  | $P$<br>(mm/yr)                                                 | $Q$<br>(km <sup>3</sup> /yr)       | $Q_s$<br>(Mt/yr)                   | $P$<br>(mm/yr)                                                 | $Q$<br>(km <sup>3</sup> /yr)         | $Q_s$<br>(Mt/yr)                  | $P$<br>(mm/yr)                                               | $Q$<br>(km <sup>3</sup> /yr)        | $Q_s$<br>(Mt/yr)                  | $P$<br>(mm/yr)                                                                 | $Q$<br>(km <sup>3</sup> /yr)         | $Q_s$<br>(Mt/yr)                  |
| Averages over pre-TGD periods                                                                                                                                                        |                                                                                   |                                      |                                   |                                                                |                                    |                                    |                                                                |                                      |                                   |                                                              |                                     |                                   |                                                                                |                                      |                                   |
| 1950–1968 <sup>b</sup>                                                                                                                                                               | 868                                                                               | 454                                  | 541                               | 886                                                            | 53                                 | 119                                | 1385                                                           | 167                                  | 35                                | 1484                                                         | 104                                 | 17                                | 1051                                                                           | 910                                  | 507                               |
| 1950–2002 <sup>c</sup>                                                                                                                                                               | 855                                                                               | 440                                  | 491                               | 875                                                            | 48                                 | 54                                 | 1397                                                           | 170                                  | 30                                | 1571                                                         | 112                                 | 15                                | 1047                                                                           | 905                                  | 432                               |
| 1993–2002 <sup>d</sup>                                                                                                                                                               | 856                                                                               | 430                                  | 378                               | 816                                                            | 35                                 | 7.8                                | 1501                                                           | 190                                  | 19                                | 1730                                                         | 129                                 | 10                                | 1075                                                                           | 964                                  | 320                               |
| Post-TGD amount (between the brackets are changes in percent relative to the pre-TGD periods 1950–1968 (first row), 1950–2002 (second row), and 1993–2002 (third row), respectively) |                                                                                   |                                      |                                   |                                                                |                                    |                                    |                                                                |                                      |                                   |                                                              |                                     |                                   |                                                                                |                                      |                                   |
| 2003                                                                                                                                                                                 | 858<br>(-1.2%)<br>(+0.4%)<br>(+0.2%)                                              | 410<br>(-9.7%)<br>(-6.8%)<br>(-4.7%) | 98<br>(-82%)<br>(-80%)<br>(-74%)  | 1125<br>(+27%)<br>(+29%)<br>(+38%)                             | 55<br>(+3.8%)<br>(+15%)<br>(+57%)  | 15<br>(-87%)<br>(-72%)<br>(+92%)   | 1204<br>(-13%)<br>(-14%)<br>(-20%)                             | 176<br>(+5.4%)<br>(+3.5%)<br>(-7.4%) | 18<br>(-49%)<br>(-40%)<br>(-5%)   | 1300<br>(-12%)<br>(-17%)<br>(-25%)                           | 90<br>(-14%)<br>(-20%)<br>(-30%)    | 5.3<br>(-69%)<br>(-65%)<br>(-47%) | 1016<br>(-3.3%)<br>(-3.0%)<br>(-5.5%)                                          | 925<br>(+1.4%)<br>(+2.2%)<br>(-4.0%) | 206<br>(-59%)<br>(-52%)<br>(-36%) |
| 2004                                                                                                                                                                                 | 903<br>(+4.0%)<br>(+5.6%)<br>(+5.4%)                                              | 414<br>(-8.8%)<br>(-5.9%)<br>(-3.7%) | 64<br>(-88%)<br>(-87%)<br>(-83%)  | 876<br>(-1.1%)<br>(+0.1%)<br>(+7.3)                            | 39<br>(-26%)<br>(-19%)<br>(+11%)   | 7.6<br>(-94%)<br>(-86%)<br>(-2.6%) | 1415<br>(+2.2%)<br>(+1.3%)<br>(-5.7%)                          | 150<br>(-10%)<br>(-12%)<br>(-21%)    | 9.1<br>(-74%)<br>(-70%)<br>(-52%) | 1340<br>(-9.7%)<br>(-15%)<br>(-22%)                          | 66<br>(-37%)<br>(-41%)<br>(-49%)    | 3.1<br>(-82%)<br>(-79%)<br>(-69%) | 1046<br>(-0.5%)<br>(-0.1%)<br>(-2.7%)                                          | 788<br>(-13%)<br>(-13%)<br>(-18%)    | 147<br>(-71%)<br>(-66%)<br>(-54%) |
| 2005                                                                                                                                                                                 | 852<br>(-1.8%)<br>(-0.4%)<br>(-0.5%)                                              | 459<br>(+1.1%)<br>(+4.3%)<br>(+6.8%) | 110<br>(-80%)<br>(-78%)<br>(-71%) | 1035<br>(+17%)<br>(+18%)<br>(+27%)                             | 68<br>(+28%)<br>(+42%)<br>(+94%)   | 17<br>(-86%)<br>(-69%)<br>(+119%)  | 1303<br>(-6.0%)<br>(-6.7%)<br>(-17%)                           | 153<br>(-8.4%)<br>(-10%)<br>(-19%)   | 6.4<br>(-82%)<br>(-79%)<br>(-67%) | 1570<br>(+5.8%)<br>(-0.1%)<br>(-9.1%)                        | 109<br>(+4.8%)<br>(-2.7%)<br>(-15%) | 6.8<br>(-60%)<br>(-55%)<br>(-32%) | 1016<br>(-3.3%)<br>(-3.0%)<br>(-5.5%)                                          | 902<br>(-0.9%)<br>(-0.3%)<br>(-6.4%) | 216<br>(-57%)<br>(-50%)<br>(-31%) |
| 2006                                                                                                                                                                                 | 760<br>(-12%)<br>(-11%)<br>(-11%)                                                 | 285<br>(-37%)<br>(-35%)<br>(-34%)    | 9.1<br>(-98%)<br>(-98%)<br>(-98%) | 762<br>(-14%)<br>(-13%)<br>(-6.7%)                             | 33<br>(-38%)<br>(-31%)<br>(-5.7%)  | 2.8<br>(-98%)<br>(-95%)<br>(-64%)  | 1356<br>(-2.1%)<br>(-2.9%)<br>(-9.7%)                          | 155<br>(-7.2%)<br>(-8.8%)<br>(-18%)  | 10<br>(-71%)<br>(-67%)<br>(-47%)  | 1630<br>(+9.8%)<br>(+3.8%)<br>(-5.8%)                        | 119<br>(+14%)<br>(+6.3%)<br>(-7.5%) | 7.2<br>(-58%)<br>(-52%)<br>(-28%) | 962<br>(-8.5%)<br>(-8.1%)<br>(-11%)                                            | 689<br>(-24%)<br>(-24%)<br>(-29%)    | 85<br>(-83%)<br>(-80%)<br>(-73%)  |
| 2007                                                                                                                                                                                 | 852<br>(-1.8%)<br>(-0.4%)<br>(-0.5%)                                              | 400<br>(-12%)<br>(-8.9%)<br>(-6.9%)  | 53<br>(-90%)<br>(-89%)<br>(-86%)  | 917<br>(+3.5%)<br>(+4.8%)<br>(+12%)                            | 45<br>(-15%)<br>(-6.3%)<br>(+29%)  | 8.3<br>(-93%)<br>(-85%)<br>(+6.4%) | 1194<br>(-14%)<br>(-15%)<br>(-20%)                             | 140<br>(-16%)<br>(-18%)<br>(-26%)    | 8.2<br>(-77%)<br>(-73%)<br>(-58%) | 1270<br>(-14%)<br>(-19%)<br>(-27%)                           | 75<br>(-28%)<br>(-33%)<br>(-42%)    | 2.9<br>(-83%)<br>(-81%)<br>(-71%) | 978<br>(-6.9%)<br>(-6.6%)<br>(-9.1%)                                           | 771<br>(-15%)<br>(-15%)<br>(-10%)    | 138<br>(-73%)<br>(-68%)<br>(-57%) |
| 2008                                                                                                                                                                                 | 886<br>(+2.1%)<br>(+3.6%)<br>(+3.4%)                                              | 419<br>(-7.7%)<br>(-4.8%)<br>(-2.7%) | 32<br>(-94%)<br>(-93%)<br>(-92%)  | 916<br>(+3.4%)<br>(+4.7%)<br>(+12%)                            | 33<br>(-38%)<br>(-31%)<br>(-5.7%)  | 4.6<br>(-96%)<br>(-91%)<br>(-41%)  | 1417<br>(+2.3%)<br>(+1.4%)<br>(-5.6%)                          | 151<br>(-9.6%)<br>(-11%)<br>(-20%)   | 7.9<br>(-77%)<br>(-74%)<br>(-59%) | 1460<br>(-1.6%)<br>(-7.1%)<br>(-16%)                         | 92<br>(-12%)<br>(-18%)<br>(-29%)    | 3.9<br>(-77%)<br>(-74%)<br>(-61%) | 1058<br>(+0.7%)<br>(+1.1%)<br>(-1.6%)                                          | 829<br>(-8.9%)<br>(-8.4%)<br>(-1.4%) | 130<br>(-74%)<br>(-70%)<br>(-59%) |
| 2009                                                                                                                                                                                 | 791<br>(-8.9%)<br>(-7.5%)<br>(-7.6%)                                              | 382<br>(-16%)<br>(-13%)<br>(-11%)    | 35<br>(-94%)<br>(-93%)<br>(-91%)  | 826<br>(-6.8%)<br>(-5.6%)<br>(+1.1%)                           | 45<br>(-15%)<br>(-6.3%)<br>(+29%)  | 4.9<br>(-96%)<br>(-91%)<br>(-37%)  | 1167<br>(-16%)<br>(-16%)<br>(-22%)                             | 135<br>(-19%)<br>(-21%)<br>(-29%)    | 3.7<br>(-89%)<br>(-88%)<br>(-81%) | 1320<br>(-11%)<br>(-16%)<br>(-24%)                           | 72<br>(-31%)<br>(-36%)<br>(-44%)    | 2.9<br>(-83%)<br>(-81%)<br>(-71%) | 935<br>(-11%)<br>(-11%)<br>(-13%)                                              | 782<br>(-14%)<br>(-14%)<br>(-19%)    | 111<br>(-78%)<br>(-74%)<br>(-65%) |
| 2010                                                                                                                                                                                 | 865<br>(-0.3%)<br>(+1.2%)<br>(+1.0%)                                              | 405<br>(-11%)<br>(-8.0%)<br>(-5.9%)  | 33<br>(-94%)<br>(-93%)<br>(-91%)  | 923<br>(+4.2%)<br>(+5.5%)<br>(+13%)                            | 66<br>(+25%)<br>(+38%)<br>(+89%)   | 12<br>(-90%)<br>(-78%)<br>(+54%)   | 1527<br>(+10%)<br>(+9.3%)<br>(+1.7%)                           | 182<br>(+9.0%)<br>(+7.1%)<br>(-4.3%) | 12<br>(-66%)<br>(-60%)<br>(-35%)  | 2110<br>(+42%)<br>(+34%)<br>(+22%)                           | 159<br>(+53%)<br>(+42%)<br>(+24%)   | 13<br>(-24%)<br>(-13%)<br>(+30%)  | 1140<br>(+8.5%)<br>(+8.9%)<br>(+6.0%)                                          | 1022<br>(+12%)<br>(+13%)<br>(+6.0%)  | 185<br>(-64%)<br>(-57%)<br>(-42%) |
| 2011                                                                                                                                                                                 | 770<br>(-11%)<br>(-10%)<br>(-10%)                                                 | 339<br>(-25%)<br>(-23%)<br>(-21%)    | 6.2<br>(-99%)<br>(-99%)<br>(-98%) | 901<br>(+1.7%)<br>(+3.0%)<br>(+10%)                            | 51<br>(-3.8%)<br>(+6.3%)<br>(+46%) | 5.4<br>(-95%)<br>(-90%)<br>(-31%)  | 954<br>(-31%)<br>(-32%)<br>(-36%)                              | 103<br>(-38%)<br>(-39%)<br>(-46%)    | 2.0<br>(-94%)<br>(-93%)<br>(-90%) | 1160<br>(-22%)<br>(-26%)<br>(-33%)                           | 64<br>(-39%)<br>(-43%)<br>(-50%)    | 4.0<br>(-77%)<br>(-73%)<br>(-60%) | 865<br>(-18%)<br>(-17%)<br>(-19%)                                              | 667<br>(-27%)<br>(-26%)<br>(-31%)    | 72<br>(-86%)<br>(-83%)<br>(-78%)  |
| 2012                                                                                                                                                                                 | 895<br>(+3.1%)<br>(+4.7%)<br>(+4.6%)                                              | 465<br>(+2.4%)<br>(+4.7%)<br>(+8.1%) | 43<br>(-92%)<br>(-91%)<br>(-89%)  | 832<br>(-6.1%)<br>(-4.9%)<br>(+2.0%)                           | 43<br>(-19%)<br>(-10%)<br>(+23%)   | 3.7<br>(-97%)<br>(-93%)<br>(-53%)  | 1513<br>(+9.2%)<br>(+8.3%)<br>(+0.8%)                          | 180<br>(+7.8%)<br>(+5.9%)<br>(-5.3%) | 6.3<br>(-82%)<br>(-79%)<br>(-67%) | 2030<br>(+37%)<br>(+29%)<br>(+17%)                           | 158<br>(+52%)<br>(+41%)<br>(+22%)   | 9.0<br>(-47%)<br>(-40%)<br>(-10%) | 1130<br>(+7.5%)<br>(+7.9%)<br>(+5.1%)                                          | 1002<br>(+10%)<br>(+10%)<br>(+3.9%)  | 161<br>(-68%)<br>(-63%)<br>(-50%) |
| Average in 2003–2012                                                                                                                                                                 | 843<br>(-2.9%)<br>(-1.4%)<br>(-1.5%)                                              | 398<br>(-12%)<br>(-9.5%)<br>(-7.5%)  | 48<br>(-91%)<br>(-90%)<br>(-87%)  | 911<br>(+2.8%)<br>(+4.1%)<br>(+12%)                            | 48<br>(-9.4%)<br>(0%)<br>(+37%)    | 8.3<br>(-93%)<br>(-85%)<br>(+6.4%) | 1305<br>(-5.8%)<br>(-6.6%)<br>(-13%)                           | 152<br>(-9.0%)<br>(-11%)<br>(-20%)   | 8.4<br>(-76%)<br>(-72%)<br>(-56%) | 1520<br>(+2.4%)<br>(-3.2%)<br>(-12%)                         | 100<br>(-3.8%)<br>(-11%)<br>(-22%)  | 5.8<br>(-66%)<br>(-61%)<br>(-42%) | 1015<br>(-3.4%)<br>(-3.1%)<br>(-5.6%)                                          | 838<br>(-7.9%)<br>(-7.4%)<br>(-1.3%) | 145<br>(-71%)<br>(-66%)<br>(-55%) |

<sup>a</sup>Yichang is 40 km downstream from TGD. <sup>b</sup>Period before decline in sediment flux at Datong due to construction of dams<sup>35</sup>. <sup>c</sup>Long term period prior to construction of the TGD during which precipitation, water and sediment discharges have longest continuous data. <sup>d</sup>Pre-TGD decade which has the same time duration as the post-TGD decade.

Table S2 Predicted contributions from various driving factors to post-TGD water-discharge changes (relative to pre-TGD averages in 1993–2002 (first row) and 1950–2002 (second row))

|           | Upstream basin at Yichang<br>(430 km <sup>3</sup> /yr in 1993–2002; 440 km <sup>3</sup> /yr in 1950–2002) ( <i>Method Q<sub>1</sub></i> ) <sup>a</sup> |                                                      |                                                      |                                                      | Hanjiang River basin<br>(35 km <sup>3</sup> /yr in 1993–2002; 48 km <sup>3</sup> /yr in 1950–2002) ( <i>Method Q<sub>1</sub></i> ) <sup>a</sup> |                                                      |                                                      | Lake Dongting basin<br>(190 km <sup>3</sup> /yr in 1993–2002; 170 km <sup>3</sup> /yr in 1950–2002) ( <i>Method Q<sub>1</sub></i> ) <sup>a</sup> |                                                      |                                                      | Lake Poyang basin<br>(129 km <sup>3</sup> /yr in 1993–2002; 110 km <sup>3</sup> /yr in 1950–2002) ( <i>Method Q<sub>1</sub></i> ) <sup>a</sup> |                                                      |                                                      | Basin upstream from Datong (tidal limit)<br>(964 km <sup>3</sup> /yr in 1993–2002; 905 km <sup>3</sup> /yr in 1950–2002) ( <i>Method Q<sub>1</sub></i> ; <i>Method Q<sub>2</sub></i> ) <sup>a</sup> |                                                      |                                                      |                                                      |
|-----------|--------------------------------------------------------------------------------------------------------------------------------------------------------|------------------------------------------------------|------------------------------------------------------|------------------------------------------------------|-------------------------------------------------------------------------------------------------------------------------------------------------|------------------------------------------------------|------------------------------------------------------|--------------------------------------------------------------------------------------------------------------------------------------------------|------------------------------------------------------|------------------------------------------------------|------------------------------------------------------------------------------------------------------------------------------------------------|------------------------------------------------------|------------------------------------------------------|-----------------------------------------------------------------------------------------------------------------------------------------------------------------------------------------------------|------------------------------------------------------|------------------------------------------------------|------------------------------------------------------|
|           | Observed changes (km <sup>3</sup> /yr) <sup>b</sup>                                                                                                    | Predicted changes (km <sup>3</sup> /yr) <sup>c</sup> | Predicted changes (km <sup>3</sup> /yr) <sup>d</sup> | Predicted changes (km <sup>3</sup> /yr) <sup>e</sup> | Observed changes (km <sup>3</sup> /yr) <sup>b</sup>                                                                                             | Predicted changes (km <sup>3</sup> /yr) <sup>c</sup> | Predicted changes (km <sup>3</sup> /yr) <sup>e</sup> | Observed changes (km <sup>3</sup> /yr) <sup>b</sup>                                                                                              | Predicted changes (km <sup>3</sup> /yr) <sup>c</sup> | Predicted changes (km <sup>3</sup> /yr) <sup>e</sup> | Observed changes (km <sup>3</sup> /yr) <sup>b</sup>                                                                                            | Predicted changes (km <sup>3</sup> /yr) <sup>c</sup> | Predicted changes (km <sup>3</sup> /yr) <sup>e</sup> | Observed changes (km <sup>3</sup> /yr) <sup>b</sup>                                                                                                                                                 | Predicted changes (km <sup>3</sup> /yr) <sup>c</sup> | Predicted changes (km <sup>3</sup> /yr) <sup>d</sup> | Predicted changes (km <sup>3</sup> /yr) <sup>e</sup> |
| 2003      | -20<br>-30                                                                                                                                             | +1±0<br>-2±0.1                                       | -14.3±1                                              | -7.0±1<br>-14±1                                      | +20<br>+7                                                                                                                                       | +14±2<br>+25±5                                       | +6±2<br>-18±5                                        | -15<br>+5                                                                                                                                        | -31±2<br>-30±2                                       | +16±2<br>+35±2                                       | -39<br>-22                                                                                                                                     | -45±5<br>-32±0.6                                     | +12±5<br>+10±0.6                                     | -39<br>+20                                                                                                                                                                                          | -71±5; -101±7<br>-44±2                               | -14.3±1                                              | +46; +76±8<br>+78±3                                  |
| 2004      | -16<br>-26                                                                                                                                             | +35±1<br>+30±1                                       | -0.3±0.1                                             | -51±1<br>-56±1                                       | +4<br>-9                                                                                                                                        | +3±0.6<br>-1±0.2                                     | +1±0.6<br>-8±0.2                                     | -40<br>-20                                                                                                                                       | -9±0.7<br>+2±0.2                                     | -31±0.7<br>-22±0.2                                   | -63<br>-46                                                                                                                                     | -41±5<br>-27±0.5                                     | -22±5<br>-19±0.4                                     | -176<br>-117                                                                                                                                                                                        | -35±2; -12±1<br>-1±0.1;                              | -0.3±0.1                                             | -141±2; -164±1<br>-106±0.2                           |
| 2005      | +29<br>+19                                                                                                                                             | -3±0.1<br>-6±0.2                                     | -0.3±0.1                                             | +32±0.2<br>+11±0.3                                   | +33<br>+20                                                                                                                                      | +10±0.2<br>+16±3                                     | +23±0.2<br>+4±3                                      | -37<br>-17                                                                                                                                       | -21±2<br>-15±1                                       | -16±2<br>-2±1                                        | -20<br>-3                                                                                                                                      | -16±2<br>0                                           | -4±2<br>-1±0                                         | -62<br>-3                                                                                                                                                                                           | -71±5; -56±4<br>-44±2                                | -0.3±0.1                                             | +9±5; -6±4<br>+41±2;                                 |
| 2006      | -145<br>-155                                                                                                                                           | -73±3<br>-70±3                                       | -9.5±1                                               | -62±4<br>-75±4                                       | -2<br>-15                                                                                                                                       | -2±0.4<br>-13±3                                      | 0±0.4<br>-2±3                                        | -35<br>-15                                                                                                                                       | -15±1<br>-7±0.6                                      | -20±1<br>-12±0.6                                     | -10<br>+7                                                                                                                                      | -11±1<br>+6±0.1                                      | +1±1<br>+1±0.1                                       | -275<br>-216                                                                                                                                                                                        | -136±10; -166±12<br>-122±6                           | -9.5±1                                               | -129±11; -109±13<br>-84±7                            |
| 2007      | -30<br>-40                                                                                                                                             | -4±0.1<br>-6±0.2                                     | -0.3±0.1                                             | -26±0.2<br>-34±0.3                                   | +10<br>-3                                                                                                                                       | +5±1<br>+4±0.8                                       | +5±1<br>-7±0.8                                       | -50<br>-30                                                                                                                                       | -32±2<br>-31±2                                       | -18±2<br>+1±2                                        | -54<br>-37                                                                                                                                     | -49±6<br>-36±0.7                                     | -5±6<br>-1±0.7                                       | -193<br>-134                                                                                                                                                                                        | -117±8; -128±9<br>-100±5                             | -0.3±0.1                                             | -76±8; -65±9<br>-34±5                                |
| 2008      | -11<br>-21                                                                                                                                             | +22±1<br>+18±1                                       | -14.1±1                                              | -19±2<br>-25±2                                       | -2<br>-15                                                                                                                                       | +5±1<br>+3±0.6                                       | -7±1<br>-18±0.6                                      | -39<br>-19                                                                                                                                       | -9±0.7<br>+3±0.2                                     | -30±0.7<br>-22±0.2                                   | -37<br>-20                                                                                                                                     | -29±3<br>-13±0.3                                     | -8±3<br>-7±0.3                                       | -135<br>-76                                                                                                                                                                                         | -21±1; -15±1<br>+16±0.8                              | -14.1±1                                              | -100±2; -106±2<br>-78±2                              |
| 2009      | -58<br>-48                                                                                                                                             | -49±2<br>-49±2                                       | -0.4±0.1                                             | -9±2<br>+1±2                                         | +11<br>-3                                                                                                                                       | +1±0.2<br>-6±1                                       | +10±0.2<br>+3±1                                      | -55<br>-35                                                                                                                                       | -35±3<br>-35±3                                       | -20±3<br>0±3                                         | -57<br>-40                                                                                                                                     | -43±5<br>-30±0.6                                     | -14±5<br>-10±0.6                                     | -182<br>-123                                                                                                                                                                                        | -167±12; -205±14<br>-160±8                           | -0.4±0.1                                             | -15±12; +23±14<br>+37±8                              |
| 2010      | -25<br>-35                                                                                                                                             | +6±0.3<br>+3±0.1                                     | -2.5±0.3                                             | -28±1<br>-35±1                                       | +31<br>+18                                                                                                                                      | +5±1<br>+4±0.8                                       | +26±1<br>+14±0.8                                     | -8<br>+12                                                                                                                                        | +3±0.2<br>+19±2                                      | -11±0.2<br>-7±2                                      | +30<br>+47                                                                                                                                     | +41±5<br>+64±1                                       | -11±5<br>-17±1                                       | +58<br>+117                                                                                                                                                                                         | +77±5; +71±5<br>+130±6                               | -2.5±0.3                                             | -16±5; -10±5<br>-10±7                                |
| 2011      | -91<br>-101                                                                                                                                            | -66±3<br>-64±3                                       | -0.4±0.1                                             | -25±3<br>-37±3                                       | +16<br>+3                                                                                                                                       | +4±0.2<br>+2±0.4                                     | +12±0.2<br>+1±0.4                                    | -87<br>-67                                                                                                                                       | -58±4<br>-68±5                                       | -29±4<br>+1±5                                        | -65<br>-48                                                                                                                                     | -61±7<br>-50±1                                       | -4±7<br>+2±1                                         | -297<br>-238                                                                                                                                                                                        | -251±18; -293±21<br>-260±13                          | -0.4±0.1                                             | -46±18; -2±21<br>+22±13                              |
| 2012      | +35<br>+25                                                                                                                                             | +29±1<br>+24±1                                       | -0.4±0.1                                             | +6±1<br>+1±1                                         | +8<br>-5                                                                                                                                        | +1±0.2<br>-5±1                                       | +7±0.2<br>0±1                                        | -10<br>+10                                                                                                                                       | +1±0.1<br>+17±1                                      | -11±0.1<br>-7±1                                      | +29<br>+46                                                                                                                                     | +33±4<br>+55±1                                       | -4±4<br>-9±1                                         | +38<br>+97                                                                                                                                                                                          | +65±5; +89±6<br>+119±5                               | -0.4±0.1                                             | -27±5; -51±6<br>-22±5                                |
| 2003–2012 | -32<br>-42                                                                                                                                             | -10±0.4<br>-8±0                                      | -4.2±0.4                                             | -18±0.9<br>-30±0.5                                   | +13<br>0                                                                                                                                        | +5±1<br>+3±0.6                                       | +8±1<br>-3±0.6                                       | -38<br>-18                                                                                                                                       | -21±2<br>-14±1                                       | -17±2<br>-4±1                                        | -29<br>-12                                                                                                                                     | -22±3<br>-6±0.1                                      | -7±3<br>-6±0.1                                       | -126<br>-67                                                                                                                                                                                         | -73±5; -81±6<br>-46±3                                | -4.2±0.4                                             | -49±5; -41±6<br>-17±3                                |

<sup>a</sup>In *Method Q<sub>1</sub>*, precipitation-based water discharge was predicted directly using post-TGD basin-wide precipitation data and the pre-TGD correlation between water discharge and precipitation in 1993–2002. In *Method Q<sub>2</sub>*, the precipitation-based water discharge at Datong was predicted first using post-TGD sub-basin precipitation data and the pre-TGD correlations between water discharge and precipitation of the sub-basins, and then using water delivery models for the middle and lower reaches of the main river. *Method S<sub>2</sub>*, was omitted for the prediction of precipitation-based change in water discharge from 1950–1968 to 2003–2012, considering that the result of this method is comparable to the result of *Method S<sub>1</sub>* as suggest by the predicted changes from 1993–2002 to 2003–2012. <sup>b</sup>Change measured over the post-TGD period relative to the pre-TGD averages in 1993–2002 (first row) and t 1950–2002 (second row). <sup>c</sup>Precipitation-based change. The error of this change is determined by Equations 22 and 23. <sup>d</sup>Change due to TGD operation; i.e., the loss of water discharge because of water impoundment and evaporation in the TGR. <sup>e</sup>Balance between the observed change and the predicted changes due to precipitation and TGD operation, presumably caused by drivers such as water consumption, other reservoirs, water-soil conservation and temperature change. The error of this predicted change for the Yichang and Datong gauging stations is determined by the errors of the predicted changes due to precipitation and TGD, i.e., being lower than the sum the errors of the predicted changes due to precipitation and TGD and larger than both of them.

Table S3 Predicted contributions from various driving factors to post-TGD sediment-load changes (relative to pre-TGD averages in 1993–2002 (first row) and 1950–1968 (second row))

|                      | Upstream basin at Yichang<br>(378 Mt/y in 1993–2002; 541 Mt/y in 1950–1968)<br>(Method S <sub>1</sub> ) <sup>a</sup> |                                        |                                        |                                        | Hanjiang River basin<br>(7.8 Mt/y in 1993–2002; 119Mt/y in 1950–1968) (Method S <sub>1</sub> ) <sup>a</sup> |                                        |                                        | Lake Dongting basin<br>(19.3 Mt/y in 1993–2002; 35 Mt/y in 1950–1968) (Method S <sub>1</sub> ) <sup>a</sup> |                                        |                                        | Lake Poyang basin<br>(10 Mt/y in 1993–2002; 17 Mt/y in 1950–1968) (Method S <sub>1</sub> ) <sup>a</sup> |                                        |                                        | Basin upstream from Datong (tidal limit)<br>(320 Mt/y in 1993–2002; 507 Mt/y in 1950–1968)<br>(Method S <sub>1</sub> ; Method S <sub>2</sub> ) <sup>a</sup> |                                        |                                        |                                        |
|----------------------|----------------------------------------------------------------------------------------------------------------------|----------------------------------------|----------------------------------------|----------------------------------------|-------------------------------------------------------------------------------------------------------------|----------------------------------------|----------------------------------------|-------------------------------------------------------------------------------------------------------------|----------------------------------------|----------------------------------------|---------------------------------------------------------------------------------------------------------|----------------------------------------|----------------------------------------|-------------------------------------------------------------------------------------------------------------------------------------------------------------|----------------------------------------|----------------------------------------|----------------------------------------|
|                      | Observed changes (Mt/yr) <sup>b</sup>                                                                                | Predicted changes (Mt/yr) <sup>c</sup> | Predicted changes (Mt/yr) <sup>d</sup> | Predicted changes (Mt/yr) <sup>e</sup> | Observed changes (Mt/yr) <sup>b</sup>                                                                       | Predicted changes (Mt/yr) <sup>c</sup> | Predicted changes (Mt/yr) <sup>e</sup> | Observed changes (Mt/yr) <sup>b</sup>                                                                       | Predicted changes (Mt/yr) <sup>c</sup> | Predicted changes (Mt/yr) <sup>e</sup> | Observed changes (Mt/yr) <sup>b</sup>                                                                   | Predicted changes (Mt/yr) <sup>c</sup> | Predicted changes (Mt/yr) <sup>e</sup> | Observed changes (Mt/yr) <sup>b</sup>                                                                                                                       | Predicted Changes (Mt/yr) <sup>c</sup> | Predicted changes (Mt/yr) <sup>d</sup> | Predicted Changes (Mt/yr) <sup>e</sup> |
| 2003                 | -280<br>-443                                                                                                         | -9±2<br>-20±3                          | -166±6                                 | -43±7<br>-257±8                        | +7.4<br>-104                                                                                                | +7.9±3<br>+106±41                      | -0.4±3<br>-210±41                      | -1.9<br>-17                                                                                                 | -8.6±3<br>-5.9±2                       | +6.7±3<br>-11±2                        | -4.7<br>-12                                                                                             | -5.1±2<br>-6.2±1                       | +0.4±2<br>-5.5±1                       | -114<br>-301                                                                                                                                                | -24±4; -27±5<br>-15±2                  | -113±7                                 | +23±9; +26±9<br>-173±8                 |
| 2004                 | -314<br>-477                                                                                                         | +66±15<br>+24±3                        | -149±4                                 | -230±17<br>-352±6                      | -0.2<br>-111                                                                                                | -1.3±0.5<br>-17±8                      | +1.1±0.5<br>-94±8                      | -10<br>-26                                                                                                  | -3.9±1<br>-0.4±0.2                     | -6.1±1<br>-26±0.2                      | -6.9<br>-14                                                                                             | -4.6±1<br>-5.2±1                       | -2.3±1<br>-8.8±1                       | -173<br>-360                                                                                                                                                | -13±2; +6±1<br>+12±2                   | -87±5                                  | -73±6; -92±6<br>-285±6                 |
| 2005                 | -268<br>-431                                                                                                         | -18±4<br>-25±3                         | -195±5                                 | -55±8<br>-211±7                        | +9.3<br>-102                                                                                                | +3.9±2<br>+58±22                       | +6.1±2<br>-160±22                      | -13<br>-29                                                                                                  | -6.5±2<br>-3.3±1                       | -6.5±2<br>-26±1                        | -3.1<br>-10                                                                                             | -2.2±0.6<br>+0.7±0.2                   | -0.9±0.6<br>-11±0.2                    | -104<br>-291                                                                                                                                                | -24±4; -18±3<br>-15±2                  | -110±6                                 | +30±8; +24±8<br>-166±7                 |
| 2006                 | -369<br>-532                                                                                                         | -145±32<br>-116±15                     | -116±2                                 | -107±31<br>-300±16                     | -5.0<br>-120                                                                                                | -3.8±1<br>-4.3±2                       | -1.2±1<br>-112±2                       | -9.0<br>-25                                                                                                 | -5.3±2<br>-2±0.8                       | -3.7±2<br>-23±0.4                      | -2.8<br>-9.8                                                                                            | -1.6±0.4<br>+2.1±0.4                   | -1.2±0.4<br>-12±0.4                    | -235<br>-322                                                                                                                                                | -44±7; -69±10<br>-64±9                 | -77±3                                  | -114±9; -89±12<br>-181±11              |
| 2007                 | -325<br>-488                                                                                                         | -19±4<br>-26±3                         | -202±5                                 | -104±8<br>-260±7                       | +0.5<br>-111                                                                                                | -0.3±0.1<br>+1.2±0.4                   | +0.8±0.1<br>-112±0.4                   | -11<br>-27                                                                                                  | -8.8±3<br>-6.1±2                       | -2.2±3<br>-21±2                        | -7.1<br>-14                                                                                             | -5.4±2<br>-6.9±1                       | -1.7±2<br>-7.1±1                       | -182<br>-369                                                                                                                                                | -38±6; -37±6<br>-50±8                  | -105±6                                 | -37±9; -40±9<br>-214±12                |
| 2008                 | -346<br>-509                                                                                                         | +37±8<br>+7±0.9                        | -235±6                                 | -148±12<br>-280±7                      | -3.2<br>-114                                                                                                | -0.2±0.1<br>+0.8±0.3                   | -3.1±0.1<br>-115±0.3                   | -11<br>-27                                                                                                  | -3.8±1<br>-0.4±0.2                     | -7.2±1<br>-27±0.2                      | -8.1<br>-13                                                                                             | -5.5±1<br>-2.7±0.6                     | -2.6±1<br>-10±0.6                      | -190<br>-377                                                                                                                                                | -8±1; +1±0.2<br>+22±3                  | -136±7                                 | -46±8; -55±7<br>-263±9                 |
| 2009                 | -343<br>-506                                                                                                         | -106±23<br>-85±11                      | -175±4                                 | -62±25<br>-246±13                      | -2.9<br>-114                                                                                                | -2.5±1<br>-1.9±2                       | -0.4±1<br>-112±2                       | -16<br>-32                                                                                                  | -9.4±3<br>-6.9±3                       | -6.6±3<br>-25±3                        | -7.0<br>-14                                                                                             | -4.9±2<br>-5.1±1                       | -2.1±2<br>-8.9±1                       | -209<br>-396                                                                                                                                                | -54±8; -71±10<br>-87±13                | -108±5                                 | -47±11; -30±13<br>-201±16              |
| 2010                 | -345<br>-508                                                                                                         | +2±0.4<br>-13±2                        | -224±4                                 | -119±4<br>-271±5                       | +4.6<br>-107                                                                                                | 0±0<br>+4.2±0.8                        | +4.6±0<br>-111±0.8                     | -6.8<br>-23                                                                                                 | -0.9±0.3<br>+2.5±1                     | -5.9±0.3<br>-26±1                      | +2.8<br>-4.2                                                                                            | +4.6±2<br>+17±4                        | -1.8±2<br>-21±4                        | -135<br>-322                                                                                                                                                | +22±3; +16±2<br>+95±14                 | -151±7                                 | -6±7; 0±3<br>-266±18                   |
| 2011                 | -372<br>-535                                                                                                         | -133±29<br>-106±14                     | -114±4                                 | -125±31<br>-315±16                     | -2.4<br>-114                                                                                                | -0.6±0.2<br>-5.6±2                     | -1.8±0.2<br>-99±2                      | -17<br>-33                                                                                                  | -13±5<br>-12±4                         | -4±3<br>-22±4                          | -6.0<br>-13                                                                                             | -6.4±2<br>-9.5±2                       | +0.4±2<br>-3.5±2                       | -248<br>-485                                                                                                                                                | -80±12; -98±15<br>-150±23              | -78±5                                  | -90±15; -72±18<br>-257±26              |
| 2012                 | -335<br>-498                                                                                                         | +53±12<br>+16±2                        | -217±6                                 | -171±15<br>-297±7                      | -4.1<br>-115                                                                                                | -2.4±1<br>-1.7±0.7                     | -1.7±1<br>-113±0.7                     | -13<br>-29                                                                                                  | -1.3±0.5<br>+2.1±1                     | -12±0.5<br>-31±1                       | -1.0<br>-8.0                                                                                            | +3.5±1<br>+15±4                        | -4.5±1<br>-23±4                        | -159<br>-346                                                                                                                                                | +18±3; +28±4<br>+87±13                 | -157±7                                 | -20±9; -30±9<br>-276±17                |
| Average in 2003–2012 | -330<br>-493                                                                                                         | -27±6<br>-35±4                         | -179±5                                 | -114±9<br>-279±7                       | +0.5<br>-111                                                                                                | +0.1±0<br>+1.6±0.6                     | +0.4±0<br>-113±0.6                     | -11<br>-27                                                                                                  | -6.1±2<br>-3.3±1                       | -4.9±2<br>-24±1                        | -4.2<br>-11                                                                                             | -2.5±0.7<br>-0.1±0                     | -1.7±0.7<br>-11±0                      | -175<br>-362                                                                                                                                                | -24±4; -27±5<br>-17±3                  | -113±6                                 | -39±8; -36±9<br>-233±8                 |

<sup>a</sup> In Method S<sub>1</sub>, the precipitation-based sediment discharge was predicted directly using post-TGD basin-wide precipitation data and the pre-TGD correlations between precipitation and water and sediment discharge. In Method S<sub>2</sub>, the precipitation-based sediment discharge at Datong was predicted firstly using the post-TGD sub-basin precipitation data and the pre-TGD correlations between precipitation and water and discharge of the sub-basins, and then using sediment delivery models for the middle and lower reaches of the main river. Method S<sub>2</sub> was omitted for the prediction of precipitation-based change in sediment flux from 1950–1968 to 2003–2012, considering that the result of this method is comparable to the result of Method S<sub>1</sub> as suggest by the predicted changes from 1993–2002 to 2003–2012. <sup>b</sup>Change measured over the post-TGD period relative to the pre-TGD averages in 1993–2002 (first row) and 1956–2002 (second row). <sup>c</sup>Change generated by precipitation; i.e., the difference between the post-TGD precipitation-based sediment discharge and the average pre-TGD sediment discharge. The error of this change is determined by Equations 22 and 23. <sup>d</sup>Change in sediment discharge due to the TGD operation; i.e., the impact of sedimentation in the TGR and downstream deposition/erosion in response to TGD operation. For the Yichang station, the error of predicted change in sediment load is basically the error in estimating the sediment flux from the ungauged areas around the TGR, assuming that the error of sediment discharge at the gauging stations is negligible. The annual sediment fluxes from the ungauged areas in 2003–2012 were predicted by Yang et al. (2014) (see their Table). In this study, we estimated the relative errors of their predictions using Equation 22 and 23. <sup>e</sup>Balance between observed and predicted change due to precipitation and TGD operation, presumably caused by drivers such as other dams, water-soil conservation, sand mining, water consumption, and temperature change. The error of this predicted change is determined by the errors of the predicted changes due to precipitation and TGD.

Table S4 An example of error estimation for predicted water discharges at Datong using the regression relationship between annual precipitation and water discharge

|      | Measured values |                                    | Predicted $Q$ values ( $\text{km}^3/\text{yr}$ ) |                                          | Errors of predicted $Q$ values ( $\text{km}^3/\text{yr}$ ) |                                         |                                           |                                          | Relative errors of predicted $Q$ values (%) |                                         |                                           |                                          |
|------|-----------------|------------------------------------|--------------------------------------------------|------------------------------------------|------------------------------------------------------------|-----------------------------------------|-------------------------------------------|------------------------------------------|---------------------------------------------|-----------------------------------------|-------------------------------------------|------------------------------------------|
|      | $P$<br>(mm/yr)  | $Q$<br>( $\text{km}^3/\text{yr}$ ) | Regression<br>of odd years <sup>1</sup>          | Regression of<br>even years <sup>2</sup> | Odd-year<br>regression for<br>even years                   | Odd-year<br>regression for<br>odd years | Even-year<br>regression for<br>even years | Even-year<br>regression for<br>odd years | Odd-year<br>regression for<br>even years    | Odd-year<br>regression for<br>odd years | Even-year<br>regression for<br>even years | Even-year<br>regression for<br>odd years |
| 1956 | 1028            | 843                                | 873                                              | 883                                      | 30                                                         |                                         | 40                                        |                                          | 4                                           |                                         | 5                                         |                                          |
| 1957 | 1022            | 824                                | 864                                              | 874                                      |                                                            | 40                                      |                                           | 50                                       |                                             | 5                                       |                                           | 6                                        |
| 1958 | 1005            | 862                                | 841                                              | 850                                      | -21                                                        |                                         | -12                                       |                                          | -2                                          |                                         | -1                                        |                                          |
| 1959 | 1016            | 773                                | 856                                              | 866                                      |                                                            | 83                                      |                                           | 93                                       |                                             | 11                                      |                                           | 12                                       |
| 1960 | 973             | 768                                | 798                                              | 807                                      | 30                                                         |                                         | 39                                        |                                          | 4                                           |                                         | 5                                         |                                          |
| 1961 | 1058            | 892                                | 913                                              | 924                                      |                                                            | 21                                      |                                           | 32                                       |                                             | 2                                       |                                           | 4                                        |
| 1962 | 1031            | 941                                | 876                                              | 886                                      | -65                                                        |                                         | -55                                       |                                          | -7                                          |                                         | -6                                        |                                          |
| 1963 | 979             | 770                                | 807                                              | 816                                      |                                                            | 37                                      |                                           | 46                                       |                                             | 5                                       |                                           | 6                                        |
| 1964 | 1065            | 1038                               | 922                                              | 933                                      | -116                                                       |                                         | -105                                      |                                          | -11                                         |                                         | -10                                       |                                          |
| 1965 | 1063            | 875                                | 919                                              | 930                                      |                                                            | 44                                      |                                           | 55                                       |                                             | 5                                       |                                           | 6                                        |
| 1966 | 904             | 775                                | 704                                              | 712                                      | -71                                                        |                                         | -63                                       |                                          | -9                                          |                                         | -8                                        |                                          |
| 1967 | 1063            | 888                                | 920                                              | 930                                      |                                                            | 32                                      |                                           | 42                                       |                                             | 4                                       |                                           | 5                                        |
| 1968 | 1086            | 944                                | 950                                              | 962                                      | 6                                                          |                                         | 18                                        |                                          | 1                                           |                                         | 2                                         |                                          |
| 1969 | 1027            | 874                                | 871                                              | 881                                      |                                                            | -3                                      |                                           | 7                                        |                                             | 0                                       |                                           | 1                                        |
| 1970 | 1119            | 992                                | 996                                              | 1008                                     | 4                                                          |                                         | 16                                        |                                          | 0                                           |                                         | 2                                         |                                          |
| 1971 | 927             | 731                                | 736                                              | 744                                      |                                                            | 5                                       |                                           | 13                                       |                                             | 1                                       |                                           | 2                                        |
| 1972 | 956             | 698                                | 774                                              | 783                                      | 76                                                         |                                         | 85                                        |                                          | 11                                          |                                         | 12                                        |                                          |
| 1973 | 1145            | 1074                               | 1031                                             | 1043                                     |                                                            | -43                                     |                                           | -31                                      |                                             | -4                                      |                                           | -3                                       |
| 1974 | 1040            | 839                                | 888                                              | 899                                      | 49                                                         |                                         | 60                                        |                                          | 6                                           |                                         | 7                                         |                                          |
| 1975 | 1126            | 1008                               | 1004                                             | 1016                                     |                                                            | -4                                      |                                           | 8                                        |                                             | 0                                       |                                           | 1                                        |
| 1976 | 975             | 842                                | 800                                              | 809                                      | -42                                                        |                                         | -33                                       |                                          | -5                                          |                                         | -4                                        |                                          |
| 1977 | 1025            | 914                                | 869                                              | 878                                      |                                                            | -45                                     |                                           | -36                                      |                                             | -5                                      |                                           | -4                                       |
| 1978 | 922             | 676                                | 729                                              | 737                                      | 53                                                         |                                         | 61                                        |                                          | 8                                           |                                         | 9                                         |                                          |
| 1979 | 950             | 738                                | 767                                              | 775                                      |                                                            | 29                                      |                                           | 37                                       |                                             | 4                                       |                                           | 5                                        |
| 1980 | 1146            | 997                                | 1032                                             | 1044                                     | 35                                                         |                                         | 47                                        |                                          | 4                                           |                                         | 5                                         |                                          |
| 1981 | 1017            | 878                                | 857                                              | 866                                      |                                                            | -21                                     |                                           | -12                                      |                                             | -2                                      |                                           | -1                                       |
| 1982 | 1099            | 957                                | 968                                              | 979                                      | 11                                                         |                                         | 22                                        |                                          | 1                                           |                                         | 2                                         |                                          |
| 1983 | 1197            | 1110                               | 1101                                             | 1114                                     |                                                            | -9                                      |                                           | 4                                        |                                             | -1                                      |                                           | 0                                        |
| 1984 | 1030            | 874                                | 874                                              | 884                                      | 0                                                          |                                         | 10                                        |                                          | 0                                           |                                         | 1                                         |                                          |
| 1985 | 991             | 823                                | 822                                              | 832                                      |                                                            | -1                                      |                                           | 9                                        |                                             | 0                                       |                                           | 1                                        |
| 1986 | 916             | 714                                | 721                                              | 728                                      | 7                                                          |                                         | 14                                        |                                          | 1                                           |                                         | 2                                         |                                          |
| 1987 | 1033            | 837                                | 879                                              | 889                                      |                                                            | 42                                      |                                           | 52                                       |                                             | 5                                       |                                           | 6                                        |
| 1988 | 940             | 832                                | 753                                              | 762                                      | -79                                                        |                                         | -70                                       |                                          | -9                                          |                                         | -8                                        |                                          |
| 1989 | 1103            | 966                                | 973                                              | 985                                      |                                                            | 7                                       |                                           | 19                                       |                                             | 1                                       |                                           | 2                                        |
| 1990 | 1042            | 906                                | 891                                              | 901                                      | -15                                                        |                                         | -5                                        |                                          | -2                                          |                                         | -1                                        |                                          |
| 1991 | 1057            | 929                                | 911                                              | 921                                      |                                                            | -18                                     |                                           | -8                                       |                                             | -2                                      |                                           | -1                                       |
| 1992 | 993             | 869                                | 824                                              | 834                                      | -45                                                        |                                         | -35                                       |                                          | -5                                          |                                         | -4                                        |                                          |
| 1993 | 1147            | 977                                | 1033                                             | 1045                                     |                                                            | 56                                      |                                           | 68                                       |                                             | 6                                       |                                           | 7                                        |
| 1994 | 1048            | 853                                | 900                                              | 910                                      | 47                                                         |                                         | 57                                        |                                          | 6                                           |                                         | 7                                         |                                          |
| 1995 | 1033            | 980                                | 879                                              | 889                                      |                                                            | -101                                    |                                           | -91                                      |                                             | -10                                     |                                           | -9                                       |
| 1996 | 1017            | 952                                | 857                                              | 867                                      | -95                                                        |                                         | -85                                       |                                          | -10                                         |                                         | -9                                        |                                          |
| 1997 | 980             | 850                                | 807                                              | 816                                      |                                                            | -43                                     |                                           | -34                                      |                                             | -5                                      |                                           | -4                                       |
| 1998 | 1211            | 1244                               | 1120                                             | 1134                                     | -124                                                       |                                         | -110                                      |                                          | -10                                         |                                         | -9                                        |                                          |
| 1999 | 1116            | 1037                               | 992                                              | 1004                                     |                                                            | -45                                     |                                           | -33                                      |                                             | -4                                      |                                           | -3                                       |
| 2000 | 1086            | 927                                | 950                                              | 961                                      | 23                                                         |                                         | 34                                        |                                          | 2                                           |                                         | 4                                         |                                          |
| 2001 | 949             | 825                                | 765                                              | 774                                      |                                                            | -60                                     |                                           | -51                                      |                                             | -7                                      |                                           | -6                                       |
| 2002 | 1158            | 993                                | 1048                                             | 1061                                     | 55                                                         |                                         | 68                                        |                                          | 6                                           |                                         | 7                                         |                                          |
| A±S  |                 |                                    |                                                  |                                          | -10±57                                                     | 0±43                                    | 0±57                                      | 10±43                                    | -1±6                                        | 0±5                                     | 0±6                                       | 1±5                                      |

<sup>1</sup> $Q = 1.3513 P - 517$ ,  $r = 0.91$ ,  $p < 0.001$ . <sup>2</sup> $Q = 1.3727 P - 529$ ,  $r = 0.89$ ,  $p < 0.001$ . Error of predicted  $Q$ : The difference between predicted and measured water discharge. Relative error of predicted  $Q$ (%):  $(\text{Predicted } Q - \text{Measured } Q) * 100 / \text{Measured } Q$ . A: average; S: Standard deviation.

Table S5 Errors of predicted water and sediment discharges at Yichang and Datong stations for the pre-TGD decade (1993–2002), using the regression relationships between annual precipitation and water discharge (Equation 2 and 6) and between water discharge and sediment flux (Equations 11 and 15) over the pre-TGD decade

|                      | For the gauging station at Yichang |                           |               |                           |               |                 |            | For the gauging station at Datong (Tidal limit) |                           |               |                           |               |                 |             |
|----------------------|------------------------------------|---------------------------|---------------|---------------------------|---------------|-----------------|------------|-------------------------------------------------|---------------------------|---------------|---------------------------|---------------|-----------------|-------------|
|                      | Measured values                    |                           |               | Predicted values $\pm S$  |               | Relative errors |            | Measured values                                 |                           |               | Predicted values $\pm S$  |               | Relative errors |             |
|                      | $P$ (mm/yr)                        | $Q$ (km <sup>3</sup> /yr) | $Q_s$ (Mt/yr) | $Q$ (km <sup>3</sup> /yr) | $Q_s$ (Mt/yr) | $Q$ (%)         | $Q_s$ (%)  | $P$ (mm/yr)                                     | $Q$ (km <sup>3</sup> /yr) | $Q_s$ (Mt/yr) | $Q$ (km <sup>3</sup> /yr) | $Q_s$ (Mt/yr) | $Q$ (%)         | $Q_s$ (%)   |
| 1993                 | 917                                | 460                       | 464           | 477 $\pm$ 20              | 471 $\pm$ 106 | 4               | 1          | 1147                                            | 977                       | 370           | 1049 $\pm$ 74             | 344 $\pm$ 46  | 7               | -7          |
| 1994                 | 789                                | 348                       | 210           | 379 $\pm$ 15              | 269 $\pm$ 60  | 9               | 28         | 1048                                            | 853                       | 239           | 932 $\pm$ 63              | 308 $\pm$ 41  | 9               | 29          |
| 1995                 | 855                                | 423                       | 363           | 429 $\pm$ 17              | 365 $\pm$ 82  | 2               | 1          | 1033                                            | 980                       | 355           | 914 $\pm$ 64              | 302 $\pm$ 41  | -7              | -15         |
| 1996                 | 813                                | 422                       | 359           | 398 $\pm$ 16              | 302 $\pm$ 68  | -6              | -16        | 1017                                            | 952                       | 324           | 894 $\pm$ 63              | 296 $\pm$ 41  | -6              | -9          |
| 1997                 | 753                                | 363                       | 337           | 352 $\pm$ 14              | 225 $\pm$ 50  | -3              | -33        | 980                                             | 850                       | 299           | 850 $\pm$ 59              | 282 $\pm$ 40  | 0               | -6          |
| 1998                 | 968                                | 523                       | 743           | 515 $\pm$ 21              | 570 $\pm$ 127 | -2              | -23        | 1211                                            | 1244                      | 401           | 1126 $\pm$ 79             | 368 $\pm$ 48  | -9              | -8          |
| 1999                 | 916                                | 482                       | 433           | 476 $\pm$ 19              | 469 $\pm$ 105 | -1              | 8          | 1116                                            | 1037                      | 317           | 1013 $\pm$ 71             | 333 $\pm$ 49  | -2              | 5           |
| 2000                 | 906                                | 471                       | 390           | 468 $\pm$ 19              | 451 $\pm$ 101 | -1              | 16         | 1086                                            | 927                       | 339           | 977 $\pm$ 69              | 322 $\pm$ 44  | 5               | -5          |
| 2001                 | 813                                | 416                       | 299           | 397 $\pm$ 16              | 301 $\pm$ 67  | -4              | 1          | 949                                             | 825                       | 276           | 814 $\pm$ 58              | 271 $\pm$ 43  | -1              | -2          |
| 2002                 | 829                                | 393                       | 228           | 410 $\pm$ 17              | 326 $\pm$ 73  | 4               | 43         | 1158                                            | 993                       | 275           | 1063 $\pm$ 74             | 348 $\pm$ 36  | 7               | 27          |
| Average in 1993–2002 | 856                                | 430                       | 383           | 430 $\pm$ 18              | 375 $\pm$ 84  | 0 $\pm$ 5       | 3 $\pm$ 23 | 1075                                            | 964                       | 320           | 963 $\pm$ 68              | 317 $\pm$ 42  | 0 $\pm$ 7       | -1 $\pm$ 15 |

$P$ : Precipitation;  $Q$ : Water discharge;  $Q_s$ : Sediment flux;  $S$ : Prediction error estimated by Equations 22 and 23.. Relative error:  $(P_v - M_v) * 100 / M_v$  where  $P_v$  and  $M_v$  represent predicted and measured values, respectively.
